# Supplementary material for: A Pterin-Dependent Signaling Pathway Regulates a Dual-Function Diguanylate Cyclase-Phosphodiesterase Controlling Surface Attachment in Agrobacterium tumefaciens
Source: PubMed Central journal article supplement — mBio. 2015 Jun 30;6(4):e00156-15. doi: 10.1128/mBio.00156-15 (PMC4488946; doi:10.1128/mbio.00156-15), 2015-06-30

S1A

A. tumefaciens - DcpA  
 C. cresc - PleD  
 P. aeruginosa - Wspr  
 C. cresc - Dgca

```

::: * * * * * : * * * * * : * * * * * : * * * * * : * * * * * : * * * * * : * * * * * :
LLLD LGFK DVND TLGH DAGD ALLQ AVAQR LSA - IGGDY DMVCRI GGDEF AVVSDD
LLID IDFK KINDFG HDIG DEVLRE FALRLAS - NVRAID LPCR YGGEEF VVIMPD
LMID VDYF KSYNDFGH VAGDEALRQ VAGAI REGCS RSSD LAARY GGEEF AMVLPG
VFFDL DGFKSV NDRF GHAA GDEAL KAVAKRLQA - NVRES D I VGRM GGDEF AVLLAQ
0.....360.....370.....380.....390.....400.....
  
```

Mg<sup>+2</sup> Binding/Catalysis →

GTP Binding →

I-Site →

Catalytic Site →

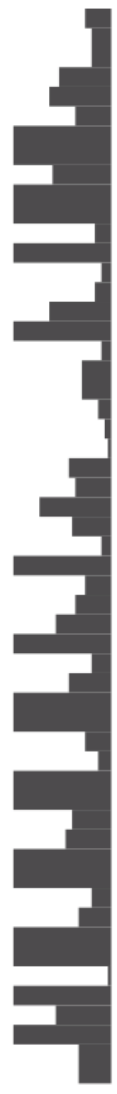

# S1B

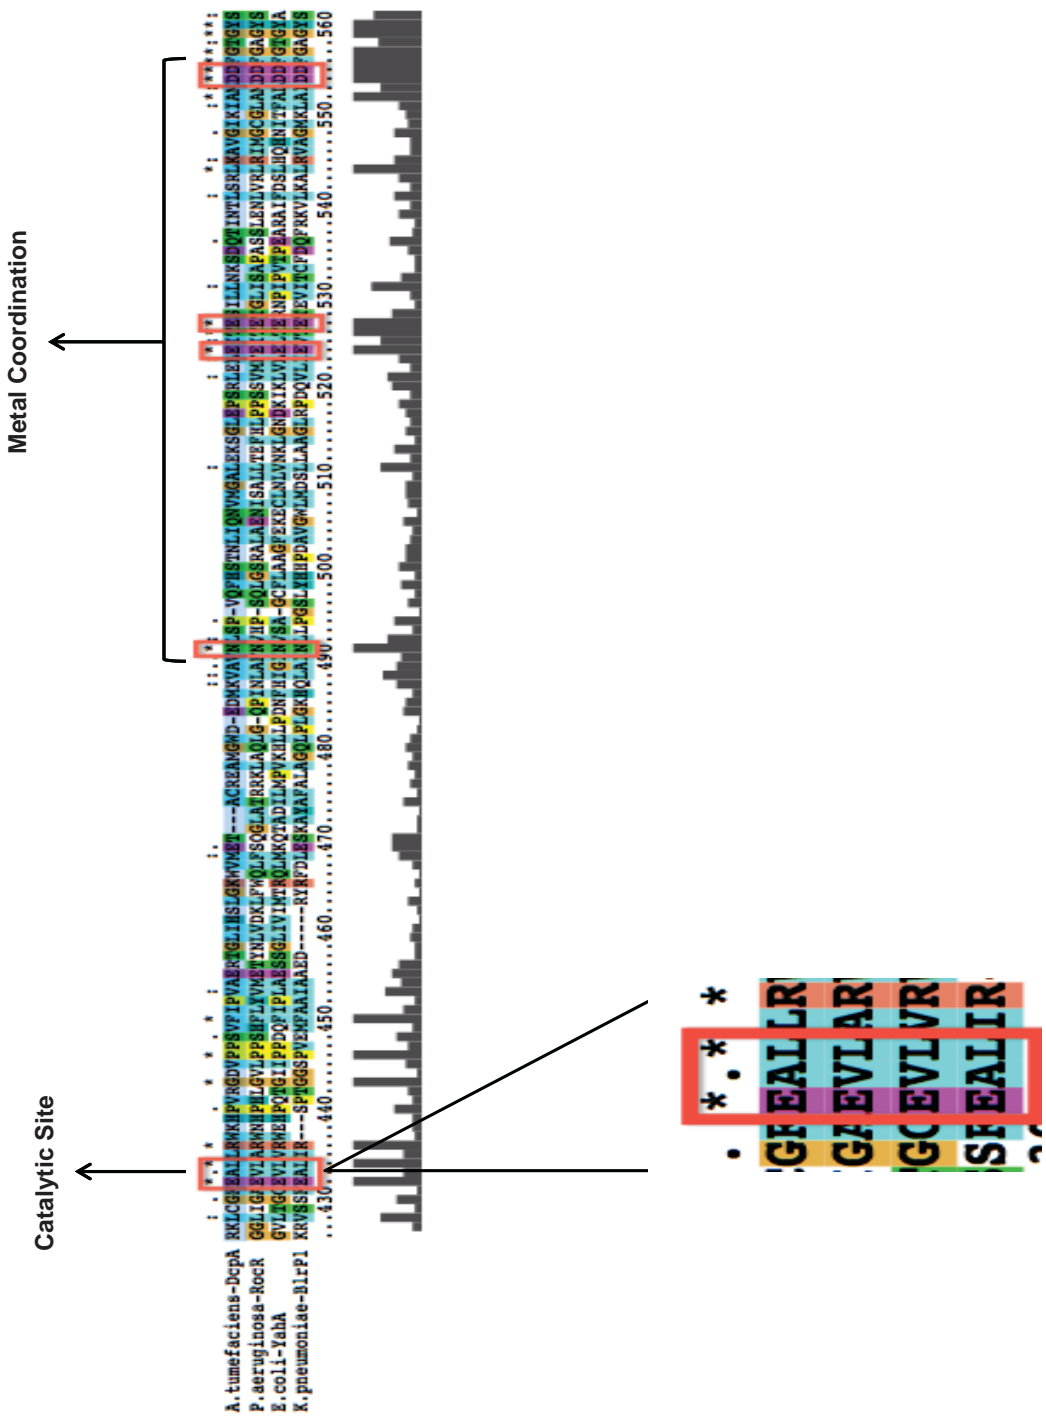

Supplement: mbo003152379sf1.pdf [file mbo003152379sf1.pdf]
