# Supplementary figures and images for: A Pterin-Dependent Signaling Pathway Regulates a Dual-Function Diguanylate Cyclase-Phosphodiesterase Controlling Surface Attachment in Agrobacterium tumefaciens
Source: PubMed Central journal article supplement — mBio. 2015 Jun 30;6(4):e00156-15. doi: 10.1128/mBio.00156-15 (PMC4488946; doi:10.1128/mbio.00156-15), 2015-06-30

## S2A

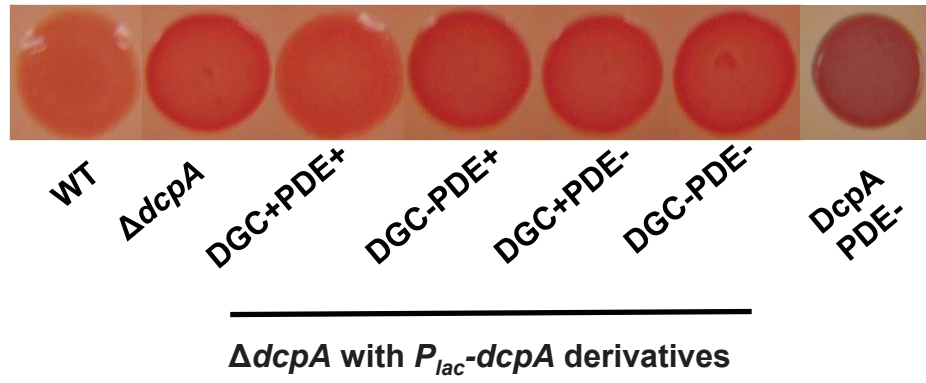

## S2B

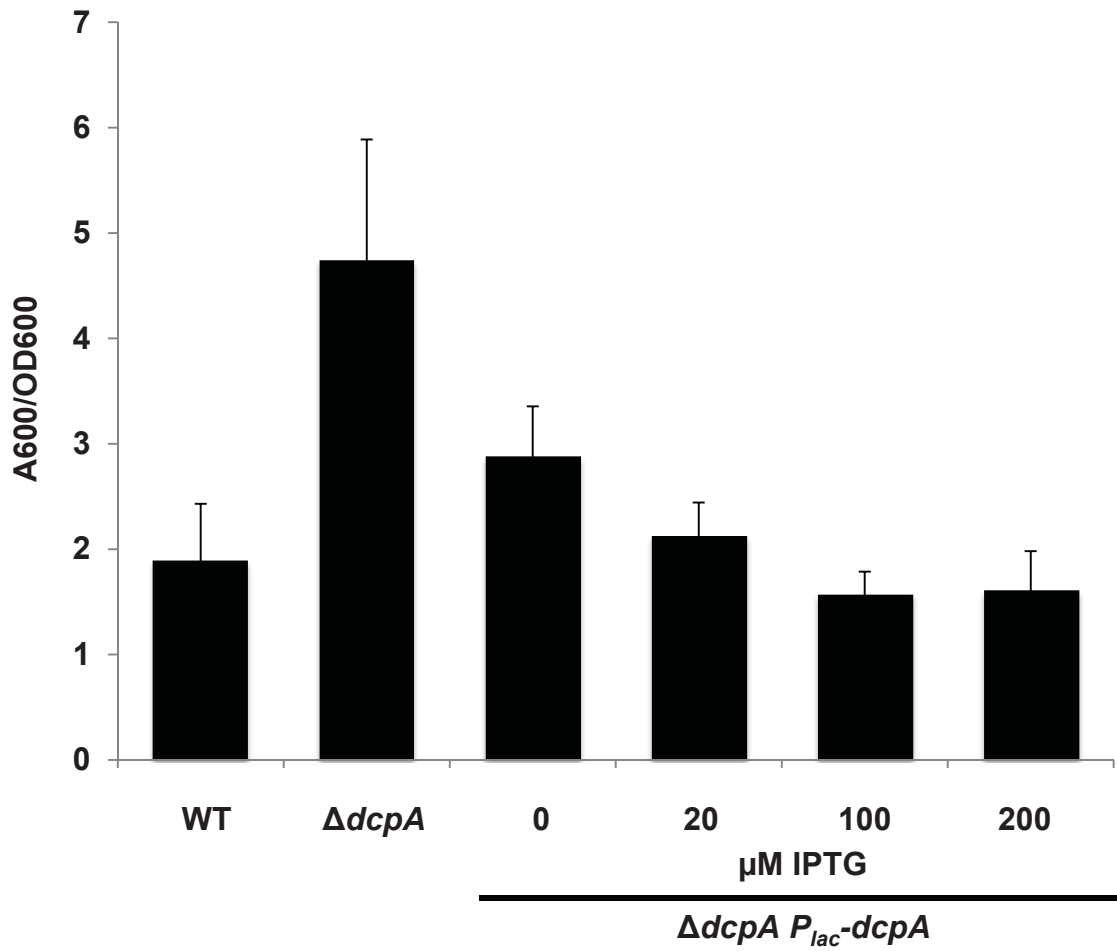

Supplement: mbo003152379sf2.pdf [file mbo003152379sf2.pdf]
